# Supplementary material for: Synergistic effects of engineered spinel hetero-metallic cobaltites on electrochemical pseudo-capacitive behaviors
Source: Royal Society of Chemistry journal article supplement (doi:10.1039/c8ta04616f), 2018-01-01
Supplement: c8ta04616f1.pdf [file c8ta04616f1.pdf]

## Supporting Information

### Synergistic Effects of Engineered Spinel Hetero-Metallic Cobaltites on Electrochemical Pseudo-Capacitive Behaviors

Young-Woo Lee,<sup>‡a,b</sup> John Hong,<sup>‡a</sup> Geon-Hyoung An,<sup>a</sup> Sangyeon Pak,<sup>a</sup> Juwon Lee,<sup>a</sup> Yuljae Cho,<sup>a</sup> Sanghyo Lee,<sup>a</sup> SeungNam Cha,<sup>\*a</sup> Jung Inn Sohn<sup>\*a,c</sup> and Jong Min Kim<sup>d</sup>

<sup>a</sup> Department of Engineering Science, University of Oxford, Oxford OX1 3PJ, UK. E-mail: seungnam.cha@eng.ox.ac.uk; Fax: +44(0)-1865-273010; Tel: +44(0)-1865-273912

<sup>b</sup> Department of Energy Systems, Soonchunhyang University, Asan, Chungcheongnam-do 31538, Republic of Korea.

<sup>c</sup> Division of Physics and Semiconductor Science, Dongguk University-Seoul, Seoul 04620, Republic of Korea. E-mail: junginn.sohn@dongguk.edu; Fax: +82-2-2277-1274; Tel: +82-2-2260-3190

<sup>d</sup> Electrical Engineering Division, Department of Engineering, University of Cambridge, 9 JJ Thomson Avenue, Cambridge, CB3 0FA, United Kingdom.

\* Corresponding author. Tel: +82-2-2260-3190. Fax: +82-2-2277-1274.

E-mail address: seungnam.cha@eng.ox.ac.uk, junginn.sohn@dongguk.edu.

<sup>‡</sup> These authors contributed equally to this work.

## Experimental method

### Material Synthesis

All chemicals were of analytical grade and used for synthesis without any further purification. The ZNCH electrodes on Ni foam were synthesized through a one-step hydrothermal synthesis. First, the conductive Ni foam was cleaned using 1.0 M HCl, ethanol, and deionized water. 0.5 mmol of  $\text{Zn}(\text{NO}_3)_2 \cdot 6\text{H}_2\text{O}$ , 0.5 mmol of  $\text{Ni}(\text{NO}_3)_2 \cdot 6\text{H}_2\text{O}$ , 2.0 mmol of  $\text{Co}(\text{NO}_3)_2 \cdot 6\text{H}_2\text{O}$ , 5.0 mmol of urea, and 3.0 mmol of  $\text{NH}_4\text{F}$  were then dissolved in deionized water. Next, the solution and Ni foam were transferred into a Teflon-lined stainless-steel autoclave. The autoclave was kept at 150 °C for 12 hr before the sample was rinsed with deionized water and dried at 60 °C for another 12 hr. Finally, the sample was annealed at 400 °C for 2 hr with a heating rate of 1 °C  $\text{min}^{-1}$  under Ar. The  $\text{ZnCo}_2\text{O}_4$  and  $\text{NiCo}_2\text{O}_4$  electrodes were similarly synthesized while only using 1.0 mmol of  $\text{Zn}(\text{NO}_3)_2 \cdot 6\text{H}_2\text{O}$  and 1.0 mmol of  $\text{Ni}(\text{NO}_3)_2 \cdot 6\text{H}_2\text{O}$  for the  $\text{ZnCo}_2\text{O}_4$  and  $\text{NiCo}_2\text{O}_4$  electrodes, respectively. The solutions were then transferred into a Teflon-lined stainless-steel autoclave and kept at 150 °C for 12 hr. Finally, the samples were annealed at 400 °C for 2 hr under the same heating rate and environmental conditions as above.

### Electrochemical Measurements

The electrochemical properties of the ZNCH electrodes were measured in a three-electrode system using a working electrode, a Pt wire as the counter electrode, and an Ag/AgCl electrode (in saturated 3 M KCl) as the reference electrode. Cyclic voltammetry (CV), galvanostatic charge/discharge (GCD), and electrochemical impedance spectroscopy (EIS) measurements were conducted with a potentiostat (PGSTAT302N, Metrohm, Autolab) at different current densities. The active carbon (AC) electrodes were fabricated by mixing the active carbon,

super-P, and Polyvinylidene Fluoride (PVDF) binder as the active material, conductive material, and binding material, respectively, in a weight ratio of 80:10:10 to obtain a slurry

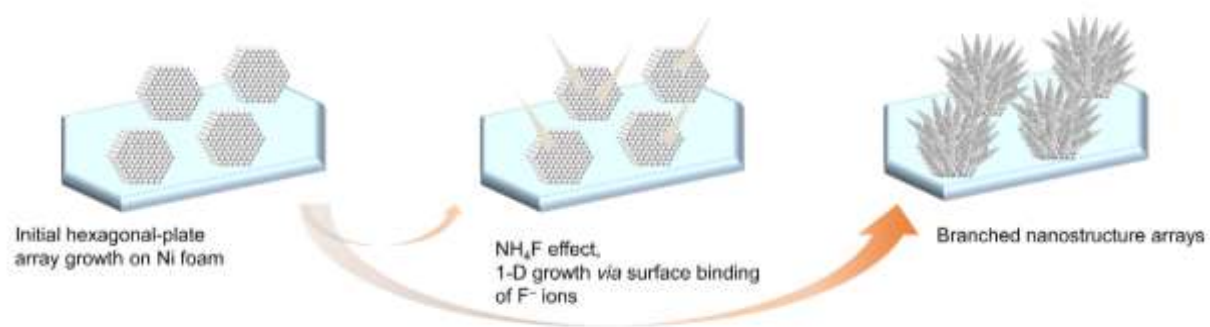

**Figure S1.** Synthetic illustration of hierarchically branched nanostructures of the ZNCH.

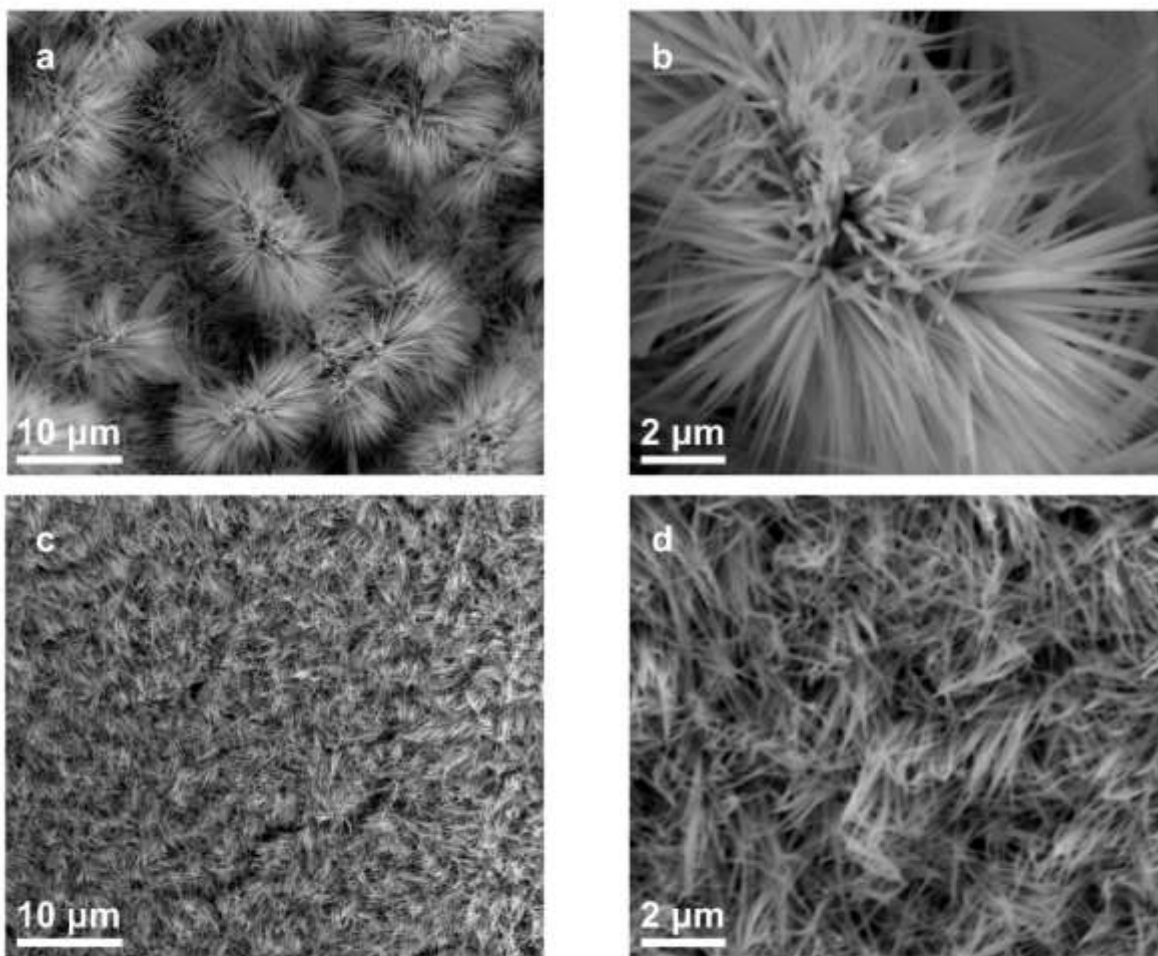

**Figure S2.** SEM images of (a,b) ZnCo<sub>2</sub>O<sub>4</sub> and (c,d) NiCo<sub>2</sub>O<sub>4</sub>.

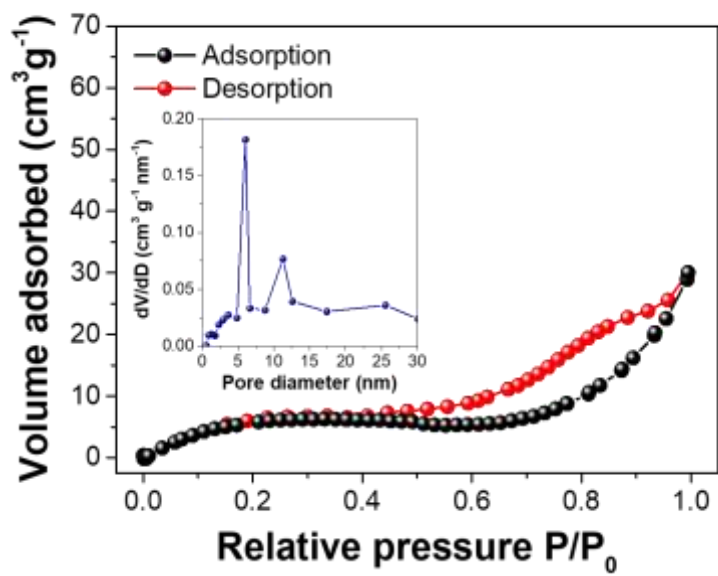

**Figure S3.** Nitrogen adsorption-desorption isotherms of the ZNCH. The inset indicates the pore size distribution of ZNCH.

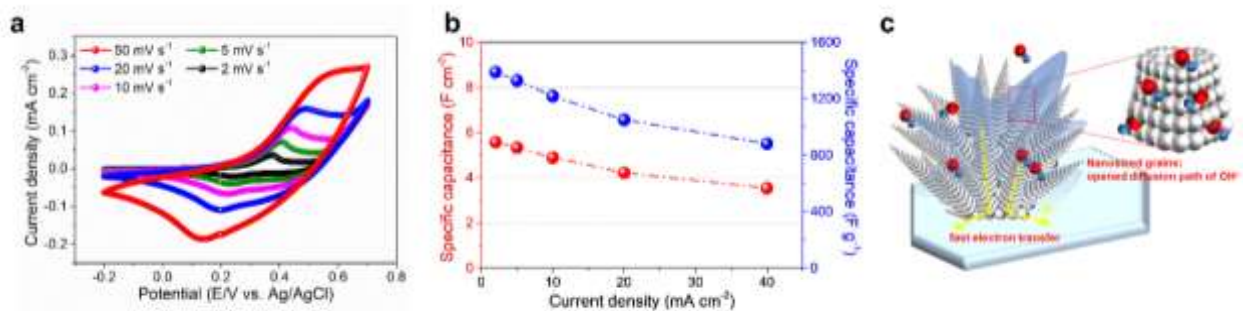

**Figure S4.** (a) CV and (b) Calculated capacitance curves of the ZNCH. (c) Schematic illustration of electrochemical kinetics of the ZNCH.

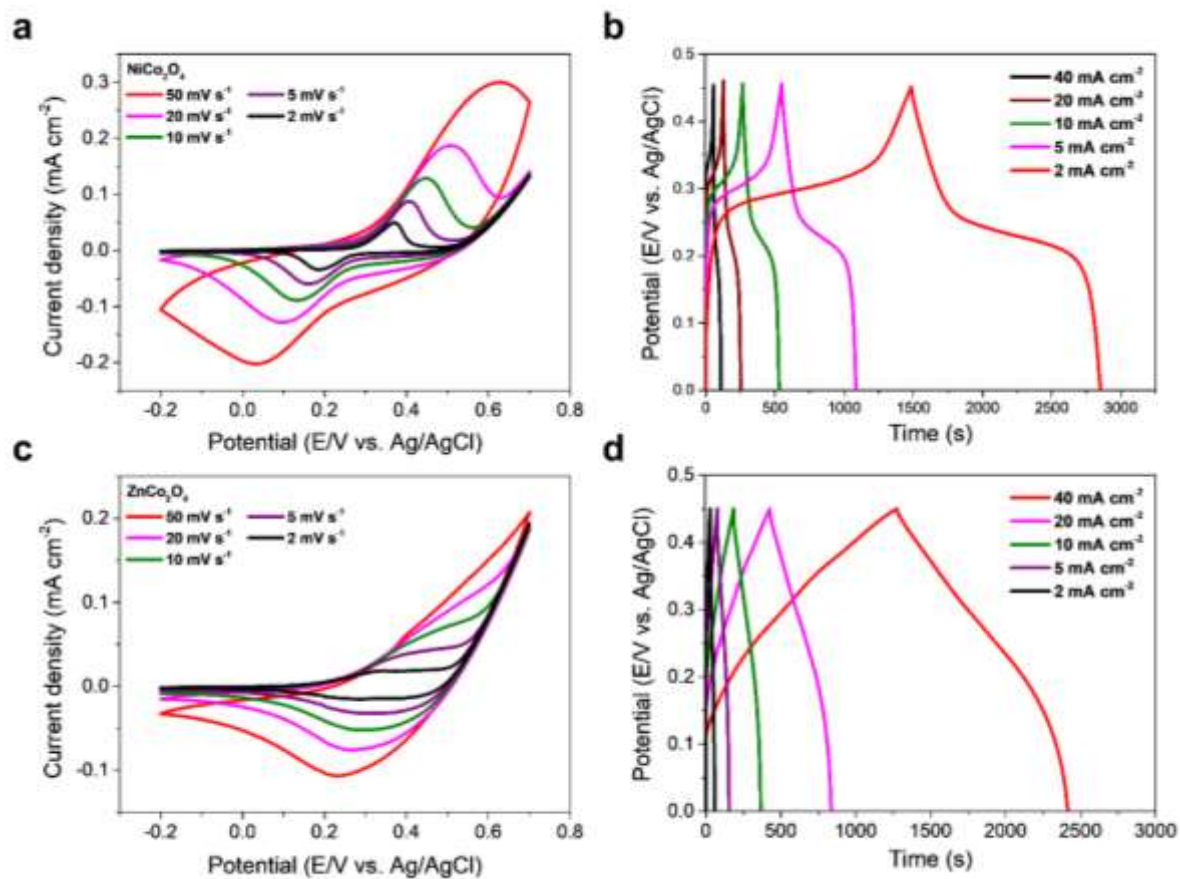

**Figure S5.** CV and GCD curves of (a)  $\text{NiCo}_2\text{O}_4$  and (b)  $\text{ZnCo}_2\text{O}_4$ .



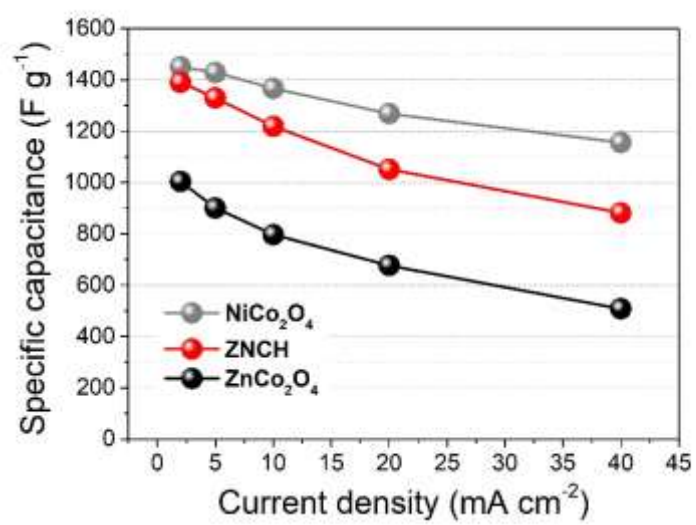

**Figure S6.** Mass capacitance comparison of the transition metal cobaltite samples.

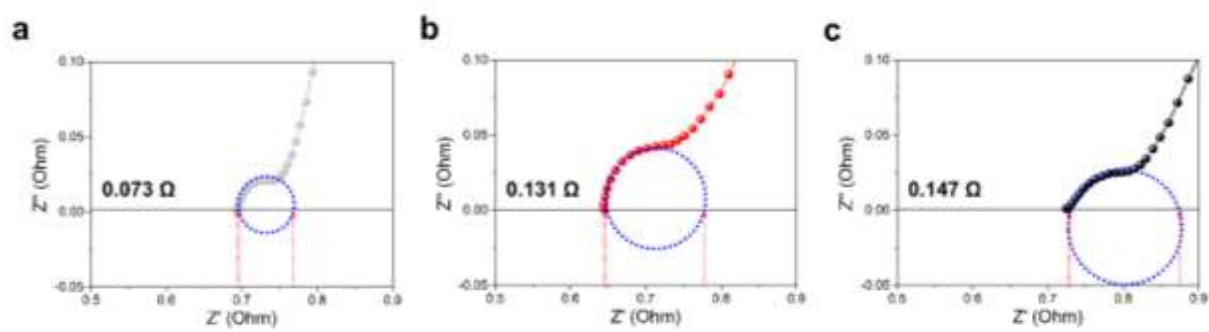

**Figure S7.** EIS curves of (a)  $\text{NiCo}_2\text{O}_4$ , (b)  $\text{ZNCH}$  and (c)  $\text{ZnCo}_2\text{O}_4$ .

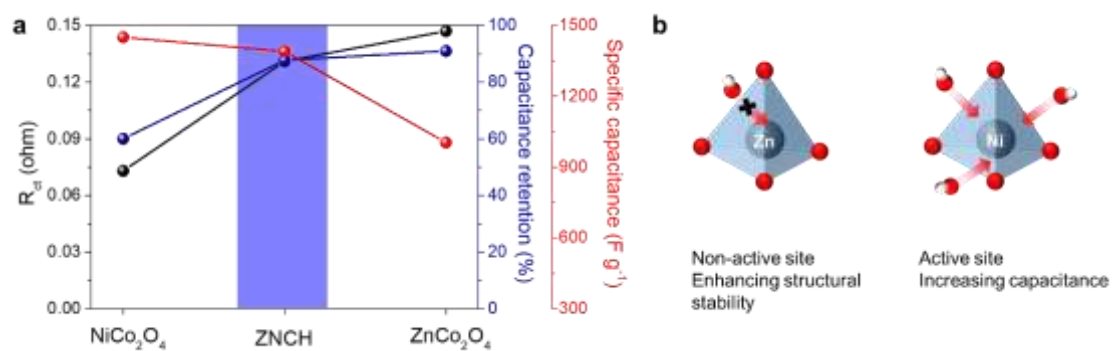

**Figure S8.** (a) A comparison of various electrochemical characteristics such as charge transfer resistance ( $R_{ct}$ ), capacity retention, and specific mass capacitance for three different electrodes. (b) Illustration images showing the electrochemical role for Zn and Ni in the tetrahedral site of spinel cobaltite structure.
